# Supplementary material for: The Life Cycle of Aurelia aurita Depends on the Presence of a Microbiome in Polyps Prior to Onset of Strobilation
Source: PubMed Central journal article supplement (PMC10433978; doi:10.1128/spectrum.00262-23), 2023-06-28
Supplement: spectrum.00262-23-s0001.pdf [file spectrum.00262-23-s0001.pdf]

**Title**

**Asexual reproduction of *Aurelia aurita* depends on the presence of a balanced microbiome at polyp stage**

Jensen N.<sup>1</sup>, Weiland-Bräuer N.<sup>1</sup>, Joel S.<sup>1</sup>, Chibani C.M.<sup>1</sup>, Schmitz R.A.<sup>1\*</sup>

<sup>1</sup> Institute of General Microbiology, Christian-Albrechts University Kiel, Am Botanischen Garten 1-9, 24118, Kiel, Germany

\* rschmitz@ifam.uni-kiel.de

Keywords: *Aurelia aurita*, native microbiota, reproduction, recolonization, life cycle

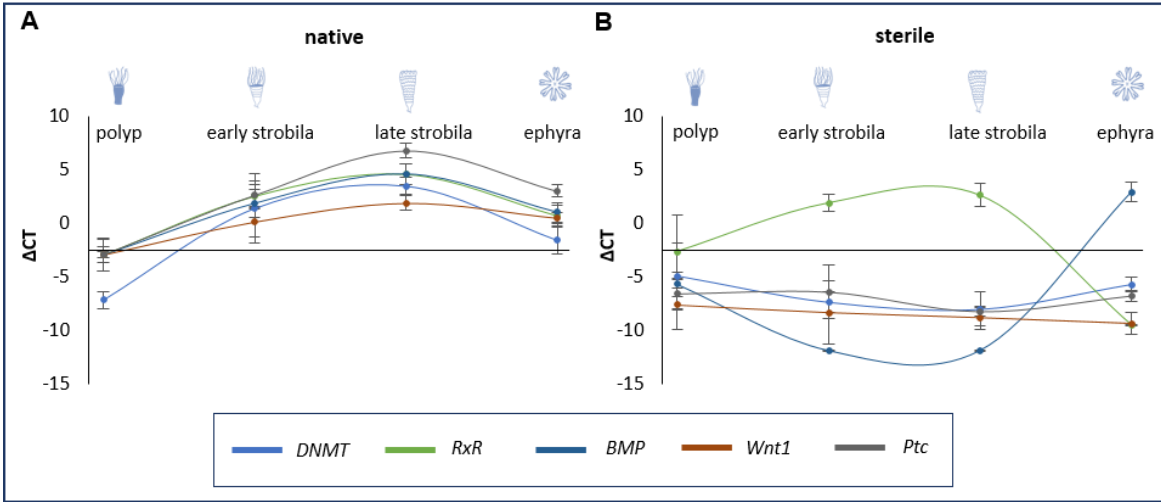

**Fig. S 1: Impact of the native microbiota on the transcription of generally conserved developmental genes during asexual reproduction.** Gene expression ( $\Delta C_t$  values) was monitored by qRT-PCR in polyps, early strobilae, late strobilae, and ephyrae in native (A) and sterile (B) animals.

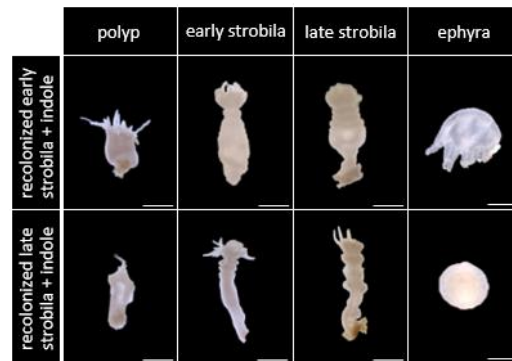

**Fig. S 2: Recolonization in constant presence of inducer does not restore defective phenotypes.** When recolonization of sterile early or late strobilae was performed with a constant supply of inducer, this did not prevent the formation of malformed strobilae, inadequate segmentation and strongly deformed ephyra.

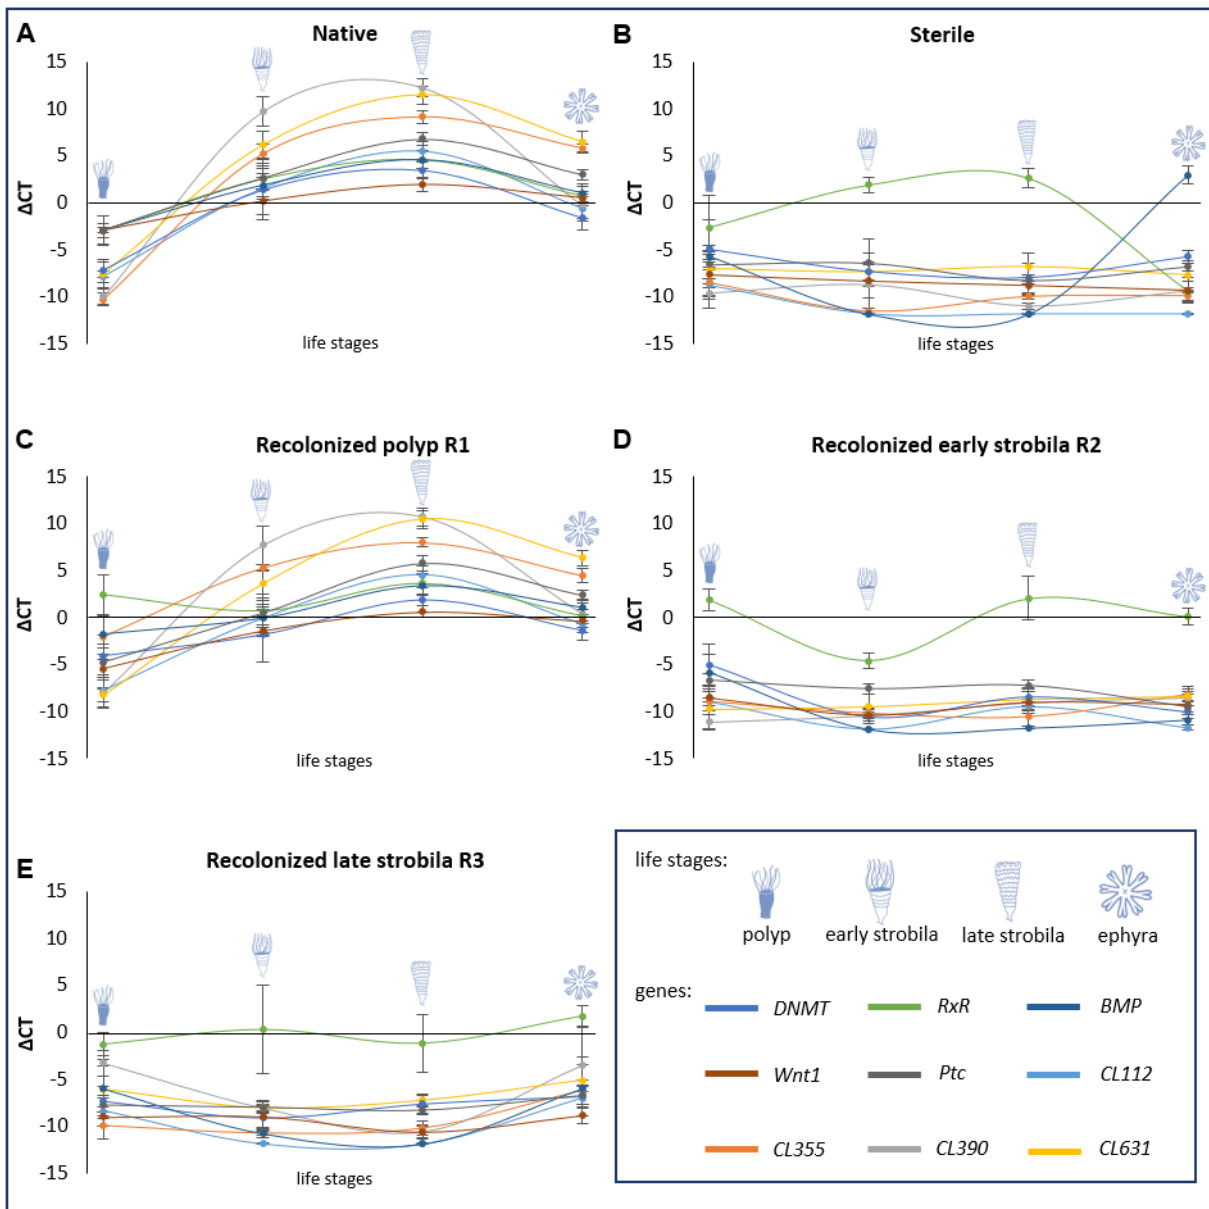

**Fig. S 3: Gene expression profiles for all assessed treatments during development over time.** The expression ( $\Delta C_t$  values) of the four *A. aurita*-specific strobilation genes and the five generally conserved developmental genes are shown for **A:** native animals, **B:** sterile animals, **C:** recolonized polyps, **D:** recolonized early strobilae), and **E:** recolonized late strobilae.

**Tab. S 1: Average ( $\Delta$ ) CT values and the respective standard abbreviation of 6 replicates.**

| Treatment | Time Point | Gene  | Average CT | Average $\Delta$ CT | Standard Abbreviation |
|-----------|------------|-------|------------|---------------------|-----------------------|
| Native    | T0         | CL112 | 36,007     | -7,88               | 0,63                  |
| Native    | T4         | CL112 | 26,607     | 1,50                | 1,16                  |
| Native    | T9         | CL112 | 22,661     | 5,44                | 1,00                  |
| Native    | T12        | CL112 | 28,726     | -0,62               | 1,29                  |
| Native    | T0         | CL355 | 38,454     | -10,34              | 0,68                  |
| Native    | T4         | CL355 | 22,903     | 5,20                | 0,97                  |
| Native    | T9         | CL355 | 18,97      | 9,13                | 0,66                  |
| Native    | T12        | CL355 | 16,296     | 5,81                | 0,47                  |
| Native    | T0         | CL390 | 38,071     | -9,97               | 0,91                  |
| Native    | T4         | CL390 | 18,437     | 9,67                | 1,57                  |
| Native    | T9         | CL390 | 15,906     | 12,20               | 0,99                  |
| Native    | T12        | CL390 | 28,396     | -0,29               | 1,43                  |
| Native    | T0         | CL631 | 35,69      | -7,59               | 1,56                  |
| Native    | T4         | CL631 | 21,994     | 6,11                | 1,43                  |
| Native    | T9         | CL631 | 16,659     | 11,44               | 0,95                  |
| Native    | T12        | CL631 | 18,647     | 6,46                | 1,09                  |
| Native    | T0         | DNMT  | 35,263     | -7,16               | 0,82                  |
| Native    | T4         | DNMT  | 26,708     | 1,40                | 3,24                  |
| Native    | T9         | DNMT  | 24,63      | 3,47                | 0,83                  |
| Native    | T12        | DNMT  | 29,699     | -1,60               | 1,25                  |
| Native    | T0         | RXR   | 31,047     | -2,94               | 1,55                  |
| Native    | T4         | RXR   | 25,57      | 2,53                | 1,11                  |
| Native    | T9         | RXR   | 23,526     | 4,58                | 0,92                  |
| Native    | T12        | RXR   | 27,407     | 0,70                | 0,98                  |
| Native    | T0         | BMP   | 32,259     | -2,94               | 1,46                  |
| Native    | T4         | BMP   | 26,247     | 1,86                | 1,27                  |
| Native    | T9         | BMP   | 23,316     | 4,58                | 0,92                  |
| Native    | T12        | BMP   | 27,081     | 1,02                | 0,91                  |
| Native    | T0         | Wnt1  | 33,45      | -2,94               | 0,76                  |
| Native    | T4         | Wnt1  | 27,977     | 0,13                | 1,38                  |
| Native    | T9         | Wnt1  | 26,231     | 1,87                | 0,69                  |
| Native    | T12        | Wnt1  | 27,623     | 0,48                | 0,48                  |
| Native    | T0         | Ptc   | 32,906     | -2,94               | 0,25                  |
| Native    | T4         | Ptc   | 25,467     | 2,64                | 1,33                  |
| Native    | T9         | Ptc   | 21,328     | 6,78                | 0,71                  |
| Native    | T12        | Ptc   | 25,119     | 2,98                | 0,57                  |
| Sterile   | T0         | CL112 | 36,473     | -8,77               | 2,40                  |
| Sterile   | T4         | CL112 | 39,975     | -11,87              | 0,04                  |
| Sterile   | T9         | CL112 | 39,98      | -11,88              | 0,04                  |
| Sterile   | T12        | CL112 | 39,982     | -11,88              | 0,04                  |
| Sterile   | T0         | CL355 | 38,013     | -8,49               | 1,32                  |
| Sterile   | T4         | CL355 | 39,643     | -11,54              | 0,26                  |

| Treatment         | Time Point | Gene  | Average CT | Average ΔCT | Standard Abbreviation |
|-------------------|------------|-------|------------|-------------|-----------------------|
| Sterile           | T9         | CL355 | 38,076     | -9,97       | 0,27                  |
| Sterile           | T12        | CL355 | 37,981     | -9,88       | 0,62                  |
| Sterile           | T0         | CL390 | 31,414     | -9,63       | 0,64                  |
| Sterile           | T4         | CL390 | 36,812     | -8,71       | 1,42                  |
| Sterile           | T9         | CL390 | 39,121     | -11,02      | 0,38                  |
| Sterile           | T12        | CL390 | 37,464     | -9,36       | 1,36                  |
| Sterile           | T0         | CL631 | 34,171     | -7,03       | 1,56                  |
| Sterile           | T4         | CL631 | 35,480     | -7,38       | 0,80                  |
| Sterile           | T9         | CL631 | 34,921     | -6,82       | 1,49                  |
| Sterile           | T12        | CL631 | 35,823     | -7,72       | 1,30                  |
| Sterile           | T0         | DNMT  | 33,035     | -4,93       | 3,11                  |
| Sterile           | T4         | DNMT  | 35,47      | -7,37       | 1,02                  |
| Sterile           | T9         | DNMT  | 36,126     | -8,02       | 1,61                  |
| Sterile           | T12        | DNMT  | 33,832     | -5,73       | 0,70                  |
| Sterile           | T0         | RXR   | 30,758     | -2,65       | 3,41                  |
| Sterile           | T4         | RXR   | 26,208     | 1,90        | 0,80                  |
| Sterile           | T9         | RXR   | 25,488     | 2,62        | 1,06                  |
| Sterile           | T12        | RXR   | 37,616     | -9,51       | 0,08                  |
| Sterile           | T0         | BMP   | 33,811     | -5,71       | 1,14                  |
| Sterile           | T4         | BMP   | 39,95      | -11,90      | 0,07                  |
| Sterile           | T9         | BMP   | 39,962     | -11,90      | 0,07                  |
| Sterile           | T12        | BMP   | 25,177     | 2,93        | 0,93                  |
| Sterile           | T0         | Wnt1  | 35,725     | -7,62       | 2,33                  |
| Sterile           | T4         | Wnt1  | 36,445     | -8,34       | 2,93                  |
| Sterile           | T9         | Wnt1  | 36,928     | -8,82       | 1,08                  |
| Sterile           | T12        | Wnt1  | 37,48      | -9,38       | 1,02                  |
| Sterile           | T0         | Ptc   | 34,687     | -6,58       | 1,45                  |
| Sterile           | T4         | Ptc   | 34,518     | -6,41       | 2,50                  |
| Sterile           | T9         | Ptc   | 36,386     | -8,28       | 0,38                  |
| Sterile           | T12        | Ptc   | 34,889     | -6,79       | 0,54                  |
| Recolonized Polyp | T0         | CL112 | 36,169     | -7,79       | 1,67                  |
| Recolonized Polyp | T4         | CL112 | 28,217     | -0,11       | 1,52                  |
| Recolonized Polyp | T9         | CL112 | 23,583     | -4,52       | 0,99                  |
| Recolonized Polyp | T12        | CL112 | 28,842     | -0,74       | 0,81                  |
| Recolonized Polyp | T0         | CL355 | 30,159     | -2,06       | 2,41                  |
| Recolonized Polyp | T4         | CL355 | 22,82      | 5,28        | 0,39                  |
| Recolonized Polyp | T9         | CL355 | 20,125     | 7,98        | 0,47                  |
| Recolonized Polyp | T12        | CL355 | 23,651     | 4,45        | 0,8                   |
| Recolonized Polyp | T0         | CL390 | 36,126     | -8,02       | 1,58                  |
| Recolonized Polyp | T4         | CL390 | 20,419     | 7,68        | 2,02                  |
| Recolonized Polyp | T9         | CL390 | 17,406     | 10,70       | 0,97                  |
| Recolonized Polyp | T12        | CL390 | 27,674     | 0,43        | 1,11                  |
| Recolonized Polyp | T0         | CL631 | 25,406     | -8,27       | 0,77                  |
| Recolonized Polyp | T4         | CL631 | 24,527     | 3,58        | 1,48                  |
| Recolonized Polyp | T9         | CL631 | 17,671     | 10,43       | 0,94                  |

| Treatment                  | Time Point | Gene  | Average CT | Average ΔCT | Standard Abbreviation |
|----------------------------|------------|-------|------------|-------------|-----------------------|
| Recolonized Polyp          | T12        | CL631 | 21,752     | 6,35        | 0,83                  |
| Recolonized Polyp          | T0         | DNMT  | 32,223     | -4,12       | 2,24                  |
| Recolonized Polyp          | T4         | DNMT  | 29,951     | -1,85       | 2,94                  |
| Recolonized Polyp          | T9         | DNMT  | 26,202     | 1,90        | 1,28                  |
| Recolonized Polyp          | T12        | DNMT  | 29,494     | -1,39       | 0,98                  |
| Recolonized Polyp          | T0         | RXR   | 25,722     | 2,38        | 2,17                  |
| Recolonized Polyp          | T4         | RXR   | 27,44      | 0,66        | 1,76                  |
| Recolonized Polyp          | T9         | RXR   | 24,508     | 3,60        | 1,11                  |
| Recolonized Polyp          | T12        | RXR   | 27,997     | 0,11        | 0,78                  |
| Recolonized Polyp          | T0         | BMP   | 29,874     | -1,77       | 2,12                  |
| Recolonized Polyp          | T4         | BMP   | 28,169     | -0,07       | 1,88                  |
| Recolonized Polyp          | T9         | BMP   | 24,688     | 3,42        | 1,07                  |
| Recolonized Polyp          | T12        | BMP   | 27,013     | 1,09        | 0,80                  |
| Recolonized Polyp          | T0         | Wnt1  | 33,547     | -5,44       | 2,22                  |
| Recolonized Polyp          | T4         | Wnt1  | 29,516     | -1,41       | 0,67                  |
| Recolonized Polyp          | T9         | Wnt1  | 27,505     | 0,60        | 0,58                  |
| Recolonized Polyp          | T12        | Wnt1  | 28,49      | -0,39       | 0,71                  |
| Recolonized Polyp          | T0         | Ptc   | 32,891     | -4,79       | 1,92                  |
| Recolonized Polyp          | T4         | Ptc   | 27,628     | 0,48        | 0,36                  |
| Recolonized Polyp          | T9         | Ptc   | 22,352     | 5,75        | 0,80                  |
| Recolonized Polyp          | T12        | Ptc   | 25,76      | 2,34        | 0,55                  |
| Recolonized early Strobila | T0         | CL112 | 36,875     | -8,93       | 0,06                  |
| Recolonized early Strobila | T4         | CL112 | 39,984     | -11,88      | 0,04                  |
| Recolonized early Strobila | T9         | CL112 | 37,56      | -9,46       | 0,51                  |
| Recolonized early Strobila | T12        | CL112 | 39,859     | -11,76      | 0,26                  |
| Recolonized early Strobila | T0         | CL355 | 36,593     | -8,98       | 0,35                  |
| Recolonized early Strobila | T4         | CL355 | 38,306     | -10,20      | 0,39                  |
| Recolonized early Strobila | T9         | CL355 | 38,664     | -10,56      | 1,01                  |
| Recolonized early Strobila | T12        | CL355 | 36,331     | -8,23       | 0,6                   |
| Recolonized early Strobila | T0         | CL390 | 37,737     | -11,11      | 0,81                  |
| Recolonized early Strobila | T4         | CL390 | 38,566     | -10,46      | 0,12                  |
| Recolonized early Strobila | T9         | CL390 | 37,246     | -9,14       | 0,41                  |
| Recolonized early Strobila | T12        | CL390 | 36,739     | -8,64       | 0,8                   |
| Recolonized early Strobila | T0         | CL631 | 35,133     | -9,74       | 2,1                   |
| Recolonized early Strobila | T4         | CL631 | 37,422     | -9,46       | 1,33                  |
| Recolonized early Strobila | T9         | CL631 | 36,787     | -8,68       | 1,1                   |
| Recolonized early Strobila | T12        | CL631 | 36,48      | -8,38       | 1,01                  |
| Recolonized early Strobila | T0         | DNMT  | 33,155     | -5,05       | 2,22                  |
| Recolonized early Strobila | T4         | DNMT  | 38,671     | -10,57      | 0,43                  |
| Recolonized early Strobila | T9         | DNMT  | 36,559     | -8,46       | 0,97                  |
| Recolonized early Strobila | T12        | DNMT  | 38,152     | -10,05      | 0,72                  |
| Recolonized early Strobila | T0         | RXR   | 26,204     | 1,90        | 1,17                  |
| Recolonized early Strobila | T4         | RXR   | 32,732     | -4,63       | 0,84                  |
| Recolonized early Strobila | T9         | RXR   | 26,081     | 2,02        | 2,30                  |
| Recolonized early Strobila | T12        | RXR   | 28,05      | 0,05        | 0,87                  |

| Treatment                  | Time Point | Gene  | Average CT | Average ΔCT | Standard Abbreviation |
|----------------------------|------------|-------|------------|-------------|-----------------------|
| Recolonized early Strobila | T0         | BMP   | 33,984     | -5,88       | 1,97                  |
| Recolonized early Strobila | T4         | BMP   | 39,981     | -11,90      | 0,03                  |
| Recolonized early Strobila | T9         | BMP   | 39,861     | -11,76      | 0,14                  |
| Recolonized early Strobila | T12        | BMP   | 39,668     | -10,90      | 0,49                  |
| Recolonized early Strobila | T0         | Wnt1  | 36,65      | -8,55       | 1,37                  |
| Recolonized early Strobila | T4         | Wnt1  | 38,564     | -10,46      | 0,81                  |
| Recolonized early Strobila | T9         | Wnt1  | 37,147     | -9,04       | 1,20                  |
| Recolonized early Strobila | T12        | Wnt1  | 37,372     | -9,27       | 1,05                  |
| Recolonized early Strobila | T0         | Ptc   | 34,784     | -6,68       | 0,73                  |
| Recolonized early Strobila | T4         | Ptc   | 35,701     | -7,60       | 0,55                  |
| Recolonized early Strobila | T9         | Ptc   | 35,355     | -7,25       | 0,60                  |
| Recolonized early Strobila | T12        | Ptc   | 37,661     | -9,56       | 0,53                  |
| Recolonized late Strobila  | T0         | CL112 | 37,037     | -8,37       | 1,58                  |
| Recolonized late Strobila  | T4         | CL112 | 39,972     | -11,87      | 0,07                  |
| Recolonized late Strobila  | T9         | CL112 | 39,982     | -11,88      | 0,04                  |
| Recolonized late Strobila  | T12        | CL112 | 35,143     | -7,04       | 1,91                  |
| Recolonized late Strobila  | T0         | CL355 | 37,087     | -9,91       | 1,45                  |
| Recolonized late Strobila  | T4         | CL355 | 38,812     | -10,71      | 0,25                  |
| Recolonized late Strobila  | T9         | CL355 | 38,291     | -10,19      | 0,77                  |
| Recolonized late Strobila  | T12        | CL355 | 34,301     | -6,20       | 2,71                  |
| Recolonized late Strobila  | T0         | CL390 | 36,195     | -3,31       | 1,32                  |
| Recolonized late Strobila  | T4         | CL390 | 36,195     | -8,09       | 0,29                  |
| Recolonized late Strobila  | T9         | CL390 | 38,726     | -10,62      | 0,6                   |
| Recolonized late Strobila  | T12        | CL390 | 31,665     | -3,56       | 4,1                   |
| Recolonized late Strobila  | T0         | CL631 | 37,843     | -6,07       | 3,17                  |
| Recolonized late Strobila  | T4         | CL631 | 36,114     | -8,01       | 0,69                  |
| Recolonized late Strobila  | T9         | CL631 | 35,342     | -7,24       | 0,65                  |
| Recolonized late Strobila  | T12        | CL631 | 33,239     | -5,14       | 2,57                  |
| Recolonized late Strobila  | T0         | DNMT  | 35,445     | -7,34       | 1,60                  |
| Recolonized late Strobila  | T4         | DNMT  | 37,229     | -9,13       | 1,48                  |
| Recolonized late Strobila  | T9         | DNMT  | 35,735     | -7,63       | 0,96                  |
| Recolonized late Strobila  | T12        | DNMT  | 34,947     | -6,84       | 1,23                  |
| Recolonized late Strobila  | T0         | RXR   | 29,389     | -1,29       | 1,23                  |
| Recolonized late Strobila  | T4         | RXR   | 27,829     | 0,27        | 4,72                  |
| Recolonized late Strobila  | T9         | RXR   | 29,287     | -1,18       | 3,06                  |
| Recolonized late Strobila  | T12        | RXR   | 26,403     | 1,70        | 1,09                  |
| Recolonized late Strobila  | T0         | BMP   | 34,13      | -6,03       | 2,41                  |
| Recolonized late Strobila  | T4         | BMP   | 38,888     | -10,79      | 0,46                  |
| Recolonized late Strobila  | T9         | BMP   | 39,975     | -11,90      | 0,04                  |
| Recolonized late Strobila  | T12        | BMP   | 34,113     | -6,01       | 0,27                  |
| Recolonized late Strobila  | T0         | Wnt1  | 37,137     | -9,03       | 1,03                  |
| Recolonized late Strobila  | T4         | Wnt1  | 37,087     | -8,98       | 1,15                  |
| Recolonized late Strobila  | T9         | Wnt1  | 38,762     | -10,66      | 0,72                  |
| Recolonized late Strobila  | T12        | Wnt1  | 36,955     | -8,85       | 0,92                  |
| Recolonized late Strobila  | T0         | Ptc   | 35,841     | -7,74       | 0,78                  |



| <b>Treatment</b>          | <b>Time Point</b> | <b>Gene</b> | <b>Average CT</b> | <b>Average <math>\Delta</math>CT</b> | <b>Standard Abbreviation</b> |
|---------------------------|-------------------|-------------|-------------------|--------------------------------------|------------------------------|
| Recolonized late Strobila | T4                | Ptc         | 36,089            | -7,99                                | 0,57                         |
| Recolonized late Strobila | T9                | Ptc         | 36,411            | -8,31                                | 0,43                         |
| Recolonized late Strobila | T12               | Ptc         | 34,773            | -6,67                                | 1,05                         |

**Tab. S 2: Student's t-tests. Determination of statistical significance between the mean of Ct-values per gene per group.**

| life stage | treatment1                 | treatment2                 | n1 | n2 | p        | p.adj    | p.adj.signif |
|------------|----------------------------|----------------------------|----|----|----------|----------|--------------|
| Segments   | native                     | recolonized early strobila | 89 | 86 | 4.74e-48 | 4.74e-47 | ****         |
| Segments   | native                     | recolonized late strobila  | 89 | 84 | 3.59e-49 | 3.59e-48 | ****         |
| Segments   | native                     | recolonized polyp          | 89 | 94 | 0.79     | 1        | ns           |
| Segments   | native                     | sterile                    | 89 | 89 | 8.13e-47 | 8.13e-46 | ****         |
| Segments   | recolonized early strobila | recolonized late strobila  | 86 | 84 | 0.397    | 1        | ns           |
| Segments   | recolonized early strobila | recolonized polyp          | 86 | 94 | 3.65e-40 | 3.65e-39 | ****         |
| Segments   | recolonized early strobila | sterile                    | 86 | 89 | 0.356    | 1        | ns           |
| Segments   | recolonized late strobila  | recolonized polyp          | 84 | 94 | 3.21e-41 | 3.21e-40 | ****         |
| Segments   | recolonized late strobila  | sterile                    | 84 | 89 | 0.082    | 0.825    | ns           |
| Segments   | recolonized polyp          | sterile                    | 94 | 89 | 5.46e-39 | 5.46e-38 | ****         |
| Ephyrae    | native                     | recolonized early strobila | 89 | 86 | 7.87e-60 | 7.87e-59 | ****         |
| Ephyrae    | native                     | recolonized late strobila  | 89 | 84 | 4.7e-61  | 4.7e-60  | ****         |
| Ephyrae    | native                     | recolonized polyp          | 89 | 94 | 0.362    | 1        | ns           |
| Ephyrae    | native                     | sterile                    | 89 | 89 | 2.63e-60 | 2.63e-59 | ****         |
| Ephyrae    | recolonized early strobila | recolonized late strobila  | 86 | 84 | 0.245    | 1        | ns           |
| Ephyrae    | recolonized early strobila | recolonized polyp          | 86 | 94 | 1.14e-58 | 1.14e-57 | ****         |
| Ephyrae    | recolonized early strobila | sterile                    | 86 | 89 | 0.024    | 0.243    | ns           |
| Ephyrae    | recolonized late strobila  | recolonized polyp          | 84 | 94 | 7.45e-60 | 7.45e-59 | ****         |
| Ephyrae    | recolonized late strobila  | sterile                    | 84 | 89 | 0.316    | 1        | ns           |
| Ephyrae    | recolonized polyp          | sterile                    | 94 | 89 | 3.2e-59  | 3.2e-58  | ****         |
